# Supplementary material
Source: PubMed Central journal article supplement (PMC7785652)
Supplement: NIHMS1635603-supplement-1.pdf [file NIHMS1635603-supplement-1.pdf]

**Supplementary Table S1.** Analyses of MSI, DNA methylation, *KRAS*, *BRAF*, and *PIK3CA* mutations, and neoantigen load

| Characteristic                                                                                                       | Method                                                                                                                                                                                                                                                                            | Reference           |
|----------------------------------------------------------------------------------------------------------------------|-----------------------------------------------------------------------------------------------------------------------------------------------------------------------------------------------------------------------------------------------------------------------------------|---------------------|
| Microsatellite instability (MSI)                                                                                     | PCR for 10 microsatellite markers (BAT25, BAT26, BAT40, D2S123, D5S346, D17S250, D18S55, D18S56, D18S67, and D18S487). MSI-high was defined as presence of instability in $\geq$ 30% of the markers.                                                                              | Ogino et al.(1)     |
| CpG island methylator phenotype (CIMP)                                                                               | Methylation analyses for eight promoters ( <i>CACNA1G</i> , <i>CDKN2A</i> , <i>CRABP1</i> , <i>IGF2</i> , <i>MLH1</i> , <i>NEUROG1</i> , <i>RUNX3</i> , and <i>SOCS1</i> ) using bisulfite-treated DNA and real-time PCR. CIMP-high was defined as $\geq$ 6 methylated promoters. | Ogino et al.(1)     |
| Long interspersed nucleotide element-1 (LINE-1) methylation level                                                    | PCR and pyrosequencing using bisulfite-treated DNA.                                                                                                                                                                                                                               | Ogino et al.(2)     |
| <i>BRAF</i> (codon 600), <i>KRAS</i> (codons 12, 13, 61 and 146), and <i>PIK3CA</i> (exons 9 and 20) mutation status | PCR and pyrosequencing.                                                                                                                                                                                                                                                           | Nosho et al.(3)     |
| Neoantigen load                                                                                                      | Whole exome sequencing to identify peptides predicted to bind to HLA molecules with high affinity.                                                                                                                                                                                | Giannakis et al.(4) |

**Supplementary Table S2.** List of antibodies and fluorophores used in the immunofluorescence procedure

| Order | Marker          | Clone           | Manufacturer,<br>catalogue number                   | Antibody<br>dilution | Fluorophore | Fluorophore<br>dilution |
|-------|-----------------|-----------------|-----------------------------------------------------|----------------------|-------------|-------------------------|
| 1     | IRF5            | EPR17067        | Abcam, ab181553                                     | 1:2000               | Opal 650    | 1:300                   |
| 2     | MAF             | EPR16484        | Abcam, ab199424                                     | 1:100                | Opal 570    | 1:150                   |
| 3     | CD68            | PG-M1           | Dako, M0876                                         | 1:40                 | Opal 520    | 1:150                   |
| 4     | CD86            | E2G8P           | Cell Signaling<br>Technology, #91882                | 1:100                | Opal 540    | 1:250                   |
| 5     | MRC1<br>(CD206) | E2L9N           | Cell Signaling<br>Technology, #91992                | 1:600                | Opal 690    | 1:150                   |
| 6     | CK              | AE1/AE3;<br>C11 | Dako, M3515;<br>Cell Signaling<br>Technology, #4545 | 1:50;<br>1:500       | Opal 620    | 1:400                   |

### Supplementary Table S3. Statistical methods

| Statistical test or model                                            | Use                                                                                                                                                                                                                    | Item                                                                                  |
|----------------------------------------------------------------------|------------------------------------------------------------------------------------------------------------------------------------------------------------------------------------------------------------------------|---------------------------------------------------------------------------------------|
| Chi-square test                                                      | To assess the relationships between ordinal macrophage density categories or year of diagnosis categories and categorical clinicopathologic features                                                                   | Table 1, Table S6, Fig. 3                                                             |
| Spearman rank correlation test                                       | To assess the correlation between continuous macrophage densities, or continuous macrophage densities and ordinal lymphocytic reaction scores                                                                          | Fig. S7, Fig. S12                                                                     |
| t-Distributed Stochastic Neighbor Embedding (tSNE)                   | To project the high dimensional data, <i>i.e.</i> , the fluorophore intensities in different cells, into two-dimensional space for visual inspection of potential heterogeneity in fluorophore intensities across TMAs | Fig. S6                                                                               |
| Kaplan-Meier analysis, log rank test                                 | To visualize cumulative survival probabilities according to macrophage densities and compare the differences between categories                                                                                        | Fig. 2, Fig. S8                                                                       |
| Univariable Cox proportional hazards regression <sup>A,B,C</sup>     | To estimate hazard ratios for cancer specific survival and overall survival according to macrophage density categories                                                                                                 | Table 2, Table S4, Table S5, Table S7, Table S8, Fig. S9, Fig. S10, Fig. S11          |
| Multivariable Cox proportional hazards regression <sup>A,B,C,D</sup> | To estimate hazard ratios and for cancer specific survival and overall survival according to macrophage density categories, adjusting for potential confounders                                                        | Table 2, Table 3, Table S4, Table S5, Table S7, Table S8, Fig. S9, Fig. S10, Fig. S11 |

<sup>A</sup> The Schoenfeld residual plots supported the proportionality of hazards during most of the follow-up period up to 10 years (data not shown), and thus, we used Cox regression models limiting the follow-up period to 10 years.

<sup>B</sup> The inverse probability weighting (IPW) method was applied to reduce the potential bias due to the availability of tumor tissue.<sup>(5)</sup> Using the multivariable logistic regression model for the entire dataset of colorectal cancer cases (regardless of available tissue), we estimated the probability of the availability of tumor tissue. Each patient with complete data was weighted by the inverse probability. Weights greater than the 95th percentile were truncated and set to the value of the 95th percentile to reduce outlier effects. We confirmed that results without weight truncation did not change substantially (data not shown). The Cox regression analyses without IPW yielded similar results to the IPW-adjusted model (data not shown).

<sup>C</sup> To assess the statistical interaction between macrophage densities/density ratio (low vs. high) and MSI status (high vs. non-high) or year of diagnosis (1995 or before vs. 1996-2000 vs. 2001-2008) in relation to cancer-specific survival, a Wald test for the cross product of the macrophage density or density ratio (high vs. low) and MSI status (high vs. non-high) or year of diagnosis

(1995 or before vs. 1996-2000 vs. 2001-2008) was performed in the IPW-adjusted Cox regression model. We estimated HR for colorectal cancer mortality comparing binarized low and high macrophage density or density ratio in the two strata of MSI status using re-parameterization of the interaction term in a single regression model.(6)

<sup>D</sup> Covariates assessed as potential confounders included sex (female vs. male), age at diagnosis (continuous), year of diagnosis (continuous), family history of colorectal cancer in any first-degree relative (present vs. absent), tumor location (proximal colon vs. distal colon vs. rectum), tumor differentiation (well to moderate vs. poor), disease stage (I/II vs. III/IV), MSI status (MSI-high vs. non-MSI-high), CIMP status (high vs. low/negative), LINE-1 methylation level (continuous), *KRAS* mutation (mutant vs. wild-type), *BRAF* mutation (mutant vs. wild-type), and *PIK3CA* mutation (mutant vs. wild-type). A backward elimination was conducted with a threshold *P* of 0.05 to select variables for the final models. Cases with the following missing data (% missing) were included in the majority category of a given categorical covariate to limit the degrees of freedom: family history of colorectal cancer in a first-degree relative (0.3%), tumor location (0.4%), tumor differentiation (0.1%), disease stage (7.2%), MSI (2.9%), CIMP (7.2%), *KRAS* (3.0%), *BRAF* (2.3%), and *PIK3CA* (8.9%). For the cases with missing data on LINE-1 methylation (3.0%), we assigned a separate indicator variable. We confirmed that excluding the cases with missing information in any of the covariates did not substantially alter results (data not shown).

**Supplementary Table S4.** Macrophage density, M1-like macrophage density, M2-like macrophage density, and M1:M2 macrophage density ratio in overall tissue regions and patient survival with inverse probability weighting (IPW)

|                                   | Colorectal cancer-specific survival |               |                          |                              | Overall survival |                          |                              |
|-----------------------------------|-------------------------------------|---------------|--------------------------|------------------------------|------------------|--------------------------|------------------------------|
|                                   | No. of cases                        | No. of events | Univariable HR (95% CI)* | Multivariable HR (95% CI)*,† | No. of events    | Univariable HR (95% CI)* | Multivariable HR (95% CI)*,† |
| <b>Macrophage density</b>         |                                     |               |                          |                              |                  |                          |                              |
| Q1                                | 232                                 | 81            | 1 (referent)             | 1 (referent)                 | 153              | 1 (referent)             | 1 (referent)                 |
| Q2                                | 233                                 | 76            | 1.07 (0.76-1.49)         | 1.25 (0.88-1.77)             | 149              | 1.23 (0.93-1.62)         | 1.28 (0.95-1.73)             |
| Q3                                | 233                                 | 73            | 0.93 (0.66-1.31)         | 1.11 (0.77-1.59)             | 136              | 0.97 (0.73-1.30)         | 1.02 (0.75-1.40)             |
| Q4                                | 233                                 | 58            | 0.70 (0.49-1.00)         | 0.93 (0.63-1.37)             | 129              | 0.86 (0.64-1.14)         | 0.93 (0.67-1.30)             |
| $P_{\text{trend}}^{\ddagger}$     |                                     |               | 0.041                    | 0.73                         |                  | 0.15                     | 0.47                         |
| <b>M1-like macrophage density</b> |                                     |               |                          |                              |                  |                          |                              |
| Q1                                | 232                                 | 89            | 1 (referent)             | 1 (referent)                 | 153              | 1 (referent)             | 1 (referent)                 |
| Q2                                | 233                                 | 75            | 0.91 (0.66-1.27)         | 1.10 (0.79-1.54)             | 154              | 1.05 (0.79-1.40)         | 1.22 (0.91-1.64)             |
| Q3                                | 233                                 | 73            | 0.73 (0.52-1.02)         | 0.89 (0.62-1.28)             | 138              | 0.82 (0.61-1.10)         | 0.92 (0.68-1.25)             |
| Q4                                | 233                                 | 51            | 0.52 (0.36-0.75)         | 0.75 (0.51-1.11)             | 122              | 0.74 (0.55-0.99)         | 0.89 (0.65-1.23)             |
| $P_{\text{trend}}^{\ddagger}$     |                                     |               | <0.001                   | 0.12                         |                  | 0.017                    | 0.27                         |
| <b>M2-like macrophage density</b> |                                     |               |                          |                              |                  |                          |                              |
| Q1                                | 232                                 | 65            | 1 (referent)             | 1 (referent)                 | 148              | 1 (referent)             | 1 (referent)                 |
| Q2                                | 233                                 | 69            | 1.18 (0.82-1.69)         | 1.33 (0.92-1.93)             | 135              | 1.20 (0.90-1.60)         | 1.30 (0.95-1.78)             |
| Q3                                | 233                                 | 77            | 1.39 (0.98-1.98)         | 1.67 (1.16-2.40)             | 143              | 1.42 (1.07-1.88)         | 1.60 (1.17-2.18)             |
| Q4                                | 233                                 | 77            | 1.37 (0.96-1.96)         | 1.51 (1.04-2.21)             | 141              | 1.19 (0.89-1.61)         | 1.21 (0.87-1.69)             |
| $P_{\text{trend}}^{\ddagger}$     |                                     |               | 0.054                    | 0.016                        |                  | 0.14                     | 0.15                         |
| <b>M1:M2 density ratio</b>        |                                     |               |                          |                              |                  |                          |                              |
| Q1                                | 232                                 | 86            | 1 (referent)             | 1 (referent)                 | 157              | 1 (referent)             | 1 (referent)                 |
| Q2                                | 232                                 | 74            | 0.82 (0.59-1.16)         | 0.97 (0.69-1.36)             | 137              | 0.96 (0.72-1.27)         | 1.03 (0.77-1.37)             |
| Q3                                | 233                                 | 77            | 0.83 (0.59-1.16)         | 0.83 (0.59-1.17)             | 146              | 0.87 (0.65-1.17)         | 0.85 (0.63-1.15)             |
| Q4                                | 233                                 | 51            | 0.48 (0.33-0.69)         | 0.61 (0.41-0.90)             | 127              | 0.65 (0.48-0.88)         | 0.67 (0.49-0.92)             |
| $P_{\text{trend}}^{\ddagger}$     |                                     |               | <0.001                   | 0.012                        |                  | 0.005                    | 0.008                        |

\* IPW was applied to reduce a bias due to the availability of tumor tissue after cancer diagnosis (see “Statistical Analysis” subsection for details).

† The multivariable Cox regression model initially included sex, age, year of diagnosis, family history of colorectal cancer, tumor location, tumor differentiation, disease stage, microsatellite instability, CpG island methylator phenotype, *KRAS*, *BRAF*, and *PIK3CA* mutations, and long-interspersed nucleotide element-1 methylation level. A backward elimination with a threshold *P* of 0.05 was used to select variables for the final models.

‡  $P_{\text{trend}}$  value was calculated across the ordinal quartiles of each macrophage density or M1 to M2 density ratio within overall region in the IPW-adjusted Cox regression model.

Abbreviations: CI, confidence interval; HR, hazard ratio; IPW, inverse probability weighting.

**Supplementary Table S5.** Densities of macrophage populations defined by positivity for single polarization marker in tumor intraepithelial and stromal regions and patient survival with inverse probability weighting (IPW)

|                                      | Colorectal cancer-specific survival |               |                          |                              | Overall survival |                          |                              |
|--------------------------------------|-------------------------------------|---------------|--------------------------|------------------------------|------------------|--------------------------|------------------------------|
|                                      | No. of cases                        | No. of events | Univariable HR (95% CI)* | Multivariable HR (95% CI)*,† | No. of events    | Univariable HR (95% CI)* | Multivariable HR (95% CI)*,† |
| <b>Tumor intraepithelial region</b>  |                                     |               |                          |                              |                  |                          |                              |
| CD86 <sup>+</sup> macrophage density |                                     |               |                          |                              |                  |                          |                              |
| Q1                                   | 320                                 | 106           | 1 (referent)             | 1 (referent)                 | 203              | 1 (referent)             | 1 (referent)                 |
| Q2                                   | 203                                 | 66            | 0.99 (0.71-1.38)         | 1.12 (0.80-1.56)             | 124              | 0.94 (0.71-1.25)         | 0.94 (0.69-1.27)             |
| Q3                                   | 204                                 | 73            | 1.14 (0.83-1.57)         | 1.16 (0.82-1.65)             | 127              | 1.19 (0.91-1.56)         | 1.23 (0.92-1.65)             |
| Q4                                   | 204                                 | 43            | 0.56 (0.38-0.82)         | 0.75 (0.49-1.16)             | 113              | 0.81 (0.61-1.07)         | 0.84 (0.61-1.15)             |
| <i>P</i> <sub>trend</sub> ‡          |                                     |               | 0.025                    | 0.52                         |                  | 0.46                     | 0.77                         |
| IRF5 <sup>+</sup> macrophage density |                                     |               |                          |                              |                  |                          |                              |
| Q1                                   | 232                                 | 84            | 1 (referent)             | 1 (referent)                 | 157              | 1 (referent)             | 1 (referent)                 |
| Q2                                   | 233                                 | 69            | 0.80 (0.57-1.13)         | 0.89 (0.62-1.28)             | 137              | 0.97 (0.72-1.29)         | 0.98 (0.73-1.33)             |
| Q3                                   | 233                                 | 66            | 0.80 (0.56-1.13)         | 0.97 (0.68-1.38)             | 135              | 1.00 (0.74-1.33)         | 1.05 (0.77-1.43)             |
| Q4                                   | 233                                 | 69            | 0.85 (0.61-1.19)         | 1.03 (0.70-1.50)             | 138              | 1.01 (0.76-1.34)         | 1.09 (0.79-1.50)             |
| <i>P</i> <sub>trend</sub> ‡          |                                     |               | 0.33                     | 0.86                         |                  | 0.93                     | 0.55                         |
| MAF <sup>+</sup> macrophage density  |                                     |               |                          |                              |                  |                          |                              |
| Q1                                   | 394                                 | 123           | 1 (referent)             | 1 (referent)                 | 246              | 1 (referent)             | 1 (referent)                 |
| Q2                                   | 178                                 | 49            | 0.86 (0.60-1.23)         | 0.94 (0.66-1.34)             | 108              | 1.03 (0.78-1.36)         | 1.07 (0.80-1.43)             |
| Q3                                   | 180                                 | 70            | 1.31 (0.96-1.78)         | 1.51 (1.09-2.08)             | 118              | 1.28 (0.98-1.66)         | 1.34 (1.01-1.76)             |
| Q4                                   | 179                                 | 46            | 0.77 (0.53-1.11)         | 0.83 (0.55-1.26)             | 95               | 0.82 (0.60-1.10)         | 0.83 (0.58-1.17)             |
| <i>P</i> <sub>trend</sub> ‡          |                                     |               | 0.64                     | 0.82                         |                  | 0.67                     | 0.81                         |
| MRC1 <sup>+</sup> macrophage density |                                     |               |                          |                              |                  |                          |                              |
| Q1                                   | 232                                 | 79            | 1 (referent)             | 1 (referent)                 | 147              | 1 (referent)             | 1 (referent)                 |
| Q2                                   | 233                                 | 72            | 0.97 (0.68-1.37)         | 1.13 (0.79-1.61)             | 143              | 1.10 (0.82-1.48)         | 1.12 (0.81-1.53)             |
| Q3                                   | 233                                 | 67            | 0.92 (0.65-1.30)         | 1.04 (0.72-1.48)             | 131              | 1.07 (0.80-1.44)         | 1.08 (0.79-1.48)             |
| Q4                                   | 233                                 | 70            | 0.96 (0.68-1.35)         | 1.09 (0.74-1.61)             | 146              | 1.18 (0.89-1.57)         | 1.12 (0.81-1.56)             |
| <i>P</i> <sub>trend</sub> ‡          |                                     |               | 0.73                     | 0.77                         |                  | 0.30                     | 0.55                         |

| <b>Tumor stromal region</b>                |     |    |                  |                  |     |                  |                  |
|--------------------------------------------|-----|----|------------------|------------------|-----|------------------|------------------|
| <b>CD86<sup>+</sup> macrophage density</b> |     |    |                  |                  |     |                  |                  |
| Q1                                         | 232 | 76 | 1 (referent)     | 1 (referent)     | 147 | 1 (referent)     | 1 (referent)     |
| Q2                                         | 233 | 83 | 1.14 (0.81-1.59) | 1.33 (0.94-1.89) | 161 | 1.29 (0.97-1.72) | 1.39 (1.02-1.90) |
| Q3                                         | 233 | 79 | 1.12 (0.80-1.58) | 1.37 (0.96-1.96) | 128 | 1.17 (0.87-1.57) | 1.28 (0.93-1.76) |
| Q4                                         | 233 | 50 | 0.59 (0.40-0.87) | 0.92 (0.60-1.40) | 131 | 0.86 (0.64-1.15) | 0.99 (0.71-1.39) |
| <i>P</i> <sub>trend</sub> <sup>†</sup>     |     |    | 0.015            | 0.87             |     | 0.26             | 0.98             |
| <b>IRF5<sup>+</sup> macrophage density</b> |     |    |                  |                  |     |                  |                  |
| Q1                                         | 232 | 75 | 1 (referent)     | 1 (referent)     | 156 | 1 (referent)     | 1 (referent)     |
| Q2                                         | 233 | 73 | 1.07 (0.75-1.52) | 1.40 (0.97-2.01) | 144 | 1.10 (0.83-1.49) | 1.26 (0.92-1.73) |
| Q3                                         | 233 | 76 | 1.05 (0.75-1.47) | 1.33 (0.93-1.91) | 142 | 1.21 (0.92-1.61) | 1.28 (0.93-1.76) |
| Q4                                         | 233 | 64 | 0.88 (0.61-1.26) | 1.26 (0.84-1.90) | 125 | 0.98 (0.73-1.32) | 1.15 (0.82-1.62) |
| <i>P</i> <sub>trend</sub> <sup>†</sup>     |     |    | 0.52             | 0.25             |     | 0.87             | 0.38             |
| <b>MAF<sup>+</sup> macrophage density</b>  |     |    |                  |                  |     |                  |                  |
| Q1                                         | 280 | 82 | 1 (referent)     | 1 (referent)     | 177 | 1 (referent)     | 1 (referent)     |
| Q2                                         | 217 | 64 | 1.01 (0.72-1.43) | 1.20 (0.86-1.67) | 135 | 1.15 (0.87-1.51) | 1.27 (0.96-1.69) |
| Q3                                         | 217 | 74 | 1.23 (0.88-1.72) | 1.46 (1.01-2.09) | 135 | 1.27 (0.97-1.67) | 1.35 (0.99-1.82) |
| Q4                                         | 217 | 68 | 1.08 (0.76-1.54) | 1.33 (0.90-1.98) | 120 | 0.99 (0.74-1.34) | 1.10 (0.79-1.53) |
| <i>P</i> <sub>trend</sub> <sup>†</sup>     |     |    | 0.44             | 0.082            |     | 0.73             | 0.41             |
| <b>MRC1<sup>+</sup> macrophage density</b> |     |    |                  |                  |     |                  |                  |
| Q1                                         | 232 | 72 | 1 (referent)     | 1 (referent)     | 153 | 1 (referent)     | 1 (referent)     |
| Q2                                         | 233 | 78 | 1.21 (0.86-1.71) | 1.39 (0.97-1.97) | 138 | 1.17 (0.87-1.56) | 1.30 (0.95-1.78) |
| Q3                                         | 233 | 81 | 1.40 (1.00-1.98) | 1.76 (1.24-2.51) | 143 | 1.36 (1.02-1.81) | 1.50 (1.10-2.04) |
| Q4                                         | 233 | 57 | 0.80 (0.55-1.17) | 1.00 (0.66-1.50) | 133 | 0.97 (0.73-1.29) | 1.02 (0.73-1.42) |
| <i>P</i> <sub>trend</sub> <sup>†</sup>     |     |    | 0.53             | 0.41             |     | 0.81             | 0.57             |

\* IPW was applied to reduce bias due to the availability of tumor tissue after cancer diagnosis (see “Statistical Analysis” subsection for details).

† The multivariable Cox regression model initially included sex, age, year of diagnosis, family history of colorectal cancer, tumor location, tumor differentiation, disease stage, microsatellite instability, CpG island methylator phenotype, *KRAS*, *BRAF*, and *PIK3CA* mutations, and long-interspersed nucleotide element-1 methylation level. A backward elimination with a threshold *P* of 0.05 was used to select variables for the final models.



‡  $P_{\text{trend}}$  value was calculated across the ordinal quartiles of each macrophage density within tumor intraepithelial and stromal regions in the IPW-adjusted Cox regression model.

Abbreviations: CI, confidence interval; HR, hazard ratio; IPW, inverse probability weighting.

**Supplementary Table S6.** Clinical, pathological, and molecular characteristics of colorectal cancer cases according to year of diagnosis

| Characteristic*                                                 | All cases<br>(N = 931) | Year of diagnosis           |                        |                        | P value† |
|-----------------------------------------------------------------|------------------------|-----------------------------|------------------------|------------------------|----------|
|                                                                 |                        | 1995 or before<br>(N = 304) | 1996-2000<br>(N = 303) | 2001-2008<br>(N = 324) |          |
| Sex                                                             |                        |                             |                        |                        | 0.54     |
| Female (NHS)                                                    | 517 (56%)              | 172 (57%)                   | 173 (57%)              | 172 (53%)              |          |
| Male (HPFS)                                                     | 414 (44%)              | 132 (43%)                   | 130 (43%)              | 152 (47%)              |          |
| Mean age ± SD (years)                                           | 68.9 ± 8.9             | 63.8 ± 8.1                  | 69.0 ± 7.7             | 73.7 ± 7.9             | <0.001   |
| Family history of colorectal cancer in first-degree relative(s) |                        |                             |                        |                        | 0.44     |
| Absent                                                          | 738 (80%)              | 232 (77%)                   | 245 (81%)              | 261 (81%)              |          |
| Present                                                         | 190 (20%)              | 69 (23%)                    | 58 (19%)               | 63 (20%)               |          |
| Tumor location                                                  |                        |                             |                        |                        | 0.018    |
| Cecum                                                           | 161 (17%)              | 44 (14%)                    | 53 (17%)               | 64 (20%)               |          |
| Ascending to transverse colon                                   | 301 (32%)              | 85 (28%)                    | 96 (32%)               | 120 (37%)              |          |
| Descending to sigmoid colon                                     | 283 (31%)              | 112 (37%)                   | 93 (31%)               | 78 (24%)               |          |
| Rectum                                                          | 182 (20%)              | 63 (21%)                    | 58 (19%)               | 61 (19%)               |          |
| Tumor differentiation                                           |                        |                             |                        |                        |          |
| Well to moderate                                                | 843 (91%)              | 269 (89%)                   | 277 (91%)              | 297 (92%)              |          |
| Poor                                                            | 87 (9.4%)              | 34 (11%)                    | 26 (8.6%)              | 27 (8.3%)              |          |
| AJCC disease stage                                              |                        |                             |                        |                        | 0.021    |
| I                                                               | 199 (23%)              | 58 (21%)                    | 61 (21%)               | 80 (27%)               |          |
| II                                                              | 282 (33%)              | 89 (32%)                    | 89 (31%)               | 104 (35%)              |          |
| III                                                             | 249 (29%)              | 81 (29%)                    | 85 (30%)               | 83 (28%)               |          |
| IV                                                              | 134 (16%)              | 54 (19%)                    | 52 (18%)               | 28 (9.5%)              |          |
| MSI status                                                      |                        |                             |                        |                        |          |
| Non-MSI-high                                                    | 750 (83%)              | 260 (86%)                   | 253 (84%)              | 237 (78%)              | 0.030    |

|                                            |                |                |                |                |        |
|--------------------------------------------|----------------|----------------|----------------|----------------|--------|
| MSI-high                                   | 154 (17%)      | 41 (14%)       | 48 (16%)       | 65 (22%)       |        |
| CIMP status                                |                |                |                |                |        |
| Low/negative                               | 705 (82%)      | 260 (87%)      | 239 (81%)      | 206 (76%)      | 0.004  |
| High                                       | 159 (18%)      | 39 (13%)       | 56 (19%)       | 64 (24%)       |        |
| Mean LINE-1 methylation level $\pm$ SD (%) | 62.5 $\pm$ 9.5 | 60.6 $\pm$ 9.3 | 60.8 $\pm$ 9.7 | 66.0 $\pm$ 8.6 | <0.001 |
| <i>KRAS</i> mutation                       |                |                |                |                | 0.69   |
| Wild-type                                  | 535 (59%)      | 182 (61%)      | 173 (58%)      | 180 (59%)      |        |
| Mutant                                     | 368 (41%)      | 116 (39%)      | 127 (42%)      | 125 (41%)      |        |
| <i>BRAF</i> mutation                       |                |                |                |                | 0.33   |
| Wild-type                                  | 771 (85%)      | 260 (87%)      | 252 (84%)      | 259 (83%)      |        |
| Mutant                                     | 139 (15%)      | 38 (13%)       | 49 (16%)       | 52 (17%)       |        |
| <i>PIK3CA</i> mutation                     |                |                |                |                | 0.74   |
| Wild-type                                  | 712 (84%)      | 229 (85%)      | 230 (85%)      | 253 (83%)      |        |
| Mutant                                     | 136 (16%)      | 41 (15%)       | 42 (15%)       | 53 (17%)       |        |
| Neoantigen load                            |                |                |                |                | 0.076  |
| Q1 (lowest)                                | 104 (25%)      | 19 (20%)       | 33 (26%)       | 52 (27%)       |        |
| Q2                                         | 104 (25%)      | 22 (23%)       | 25 (20%)       | 57 (30%)       |        |
| Q3                                         | 104 (25%)      | 25 (26%)       | 41 (32%)       | 38 (20%)       |        |
| Q4 (highest)                               | 104 (25%)      | 30 (31%)       | 29 (23%)       | 45 (23%)       |        |
| Macrophage density                         |                |                |                |                | <0.001 |
| Q1 (lowest)                                | 232 (25%)      | 107 (35%)      | 60 (20%)       | 65 (20%)       |        |
| Q2                                         | 233 (25%)      | 82 (27%)       | 74 (24%)       | 77 (24%)       |        |
| Q3                                         | 233 (25%)      | 57 (19%)       | 82 (27%)       | 94 (29%)       |        |
| Q4 (highest)                               | 233 (25%)      | 58 (19%)       | 87 (29%)       | 88 (27%)       |        |
| Tumor cell density                         |                |                |                |                | 0.52   |
| Q1 (lowest)                                | 232 (25%)      | 87 (29%)       | 72 (24%)       | 73 (23%)       |        |
| Q2                                         | 233 (25%)      | 72 (24%)       | 82 (27%)       | 79 (24%)       |        |
| Q3                                         | 233 (25%)      | 76 (25%)       | 70 (23%)       | 87 (27%)       |        |

|                                |           |          |          |          |      |
|--------------------------------|-----------|----------|----------|----------|------|
| Q4 (highest)                   | 233 (25%) | 69 (23%) | 79 (26%) | 85 (26%) |      |
| Mean cytoplasmic KRT intensity |           |          |          |          | 0.31 |
| Q1 (lowest)                    | 232 (25%) | 77 (25%) | 73 (24%) | 82 (25%) |      |
| Q2                             | 233 (25%) | 86 (28%) | 64 (21%) | 83 (26%) |      |
| Q3                             | 233 (25%) | 65 (21%) | 83 (27%) | 85 (26%) |      |
| Q4 (highest)                   | 233 (25%) | 76 (25%) | 83 (27%) | 74 (23%) |      |

---

\* Percentage indicates the proportion of patients with a specific clinical, pathologic, or molecular characteristic among all patients or in strata of year of diagnosis

† To compare categorical data between the ordinal categories of macrophage density, the chi-square test was performed. To compare continuous variables, an analysis of variance was performed.

Abbreviations: AJCC, American Joint Committee on Cancer; CIMP, CpG island methylator phenotype; HPFS, Health Professionals Follow-up Study; LINE-1, long-interspersed nucleotide element-1; MSI, microsatellite instability; NHS, Nurses' Health Study; SD, standard deviation.

**Supplementary Table S7.** Macrophage densities and M1:M2 macrophage density ratio in tumor intraepithelial and stromal regions and patient survival in strata of MSI status with inverse probability weighting (IPW)

|                                     | Tumor intraepithelial region        |               |                          |                              | Stromal region                      |               |                          |                              |
|-------------------------------------|-------------------------------------|---------------|--------------------------|------------------------------|-------------------------------------|---------------|--------------------------|------------------------------|
|                                     | Colorectal cancer-specific survival |               |                          |                              | Colorectal cancer-specific survival |               |                          |                              |
|                                     | No. of cases                        | No. of events | Univariable HR (95% CI)* | Multivariable HR (95% CI)*,† | No. of cases                        | No. of events | Univariable HR (95% CI)* | Multivariable HR (95% CI)*,† |
| <b>Non-MSI-high</b>                 |                                     |               |                          |                              |                                     |               |                          |                              |
| Macrophage density                  |                                     |               |                          |                              |                                     |               |                          |                              |
| Low                                 | 415                                 | 145           | 1 (referent)             | 1 (referent)                 | 400                                 | 148           | 1 (referent)             | 1 (referent)                 |
| High                                | 335                                 | 112           | 1.00 (0.76-1.30)         | 0.92 (0.69-1.22)             | 350                                 | 109           | 0.86 (0.66-1.12)         | 0.93 (0.71-1.24)             |
| <b>MSI-high</b>                     |                                     |               |                          |                              |                                     |               |                          |                              |
| Macrophage density                  |                                     |               |                          |                              |                                     |               |                          |                              |
| Low                                 | 37                                  | 7             | 1 (referent)             | 1 (referent)                 | 52                                  | 11            | 1 (referent)             | 1 (referent)                 |
| High                                | 117                                 | 15            | 0.45 (0.18-1.14)         | 0.27 (0.11-0.66)             | 102                                 | 11            | 0.35 (0.14-0.86)         | 0.25 (0.10-0.63)             |
| $P_{\text{interaction}}^{\ddagger}$ |                                     |               | 0.11                     | 0.018                        |                                     |               | 0.061                    | 0.011                        |
| <b>Non-MSI-high</b>                 |                                     |               |                          |                              |                                     |               |                          |                              |
| M1-like macrophage density          |                                     |               |                          |                              |                                     |               |                          |                              |
| Low                                 | 406                                 | 145           | 1 (referent)             | 1 (referent)                 | 401                                 | 160           | 1 (referent)             | 1 (referent)                 |
| High                                | 344                                 | 112           | 0.87 (0.67-1.13)         | 0.93 (0.71-1.22)             | 349                                 | 97            | 0.63 (0.49-0.83)         | 0.74 (0.56-0.98)             |
| <b>MSI-high</b>                     |                                     |               |                          |                              |                                     |               |                          |                              |
| M1-like macrophage density          |                                     |               |                          |                              |                                     |               |                          |                              |
| Low                                 | 46                                  | 10            | 1 (referent)             | 1 (referent)                 | 51                                  | 14            | 1 (referent)             | 1 (referent)                 |
| High                                | 108                                 | 12            | 0.36 (0.15-0.88)         | 0.37 (0.14-0.94)             | 103                                 | 8             | 0.16 (0.07-0.42)         | 0.24 (0.09-0.67)             |
| $P_{\text{interaction}}^{\ddagger}$ |                                     |               | 0.062                    | 0.080                        |                                     |               | 0.006                    | 0.057                        |
| <b>Non-MSI-high</b>                 |                                     |               |                          |                              |                                     |               |                          |                              |
| M2-like macrophage density          |                                     |               |                          |                              |                                     |               |                          |                              |
| Low                                 | 403                                 | 133           | 1 (referent)             | 1 (referent)                 | 375                                 | 116           | 1 (referent)             | 1 (referent)                 |

|                                     |     |     |                  |                  |     |     |                  |                  |
|-------------------------------------|-----|-----|------------------|------------------|-----|-----|------------------|------------------|
| High                                | 347 | 124 | 1.24 (0.95-1.61) | 1.22 (0.93-1.61) | 375 | 141 | 1.40 (1.08-1.83) | 1.62 (1.22-2.14) |
| <b>MSI-high</b>                     |     |     |                  |                  |     |     |                  |                  |
| M2-like macrophage density          |     |     |                  |                  |     |     |                  |                  |
| Low                                 | 49  | 8   | 1 (referent)     | 1 (referent)     | 77  | 10  | 1 (referent)     | 1 (referent)     |
| High                                | 105 | 14  | 0.86 (0.33-2.25) | 0.64 (0.23-1.75) | 77  | 12  | 1.29 (0.52-3.21) | 1.09 (0.41-2.87) |
| $P_{\text{interaction}}^{\ddagger}$ |     |     | 0.47             | 0.21             |     |     | 0.86             | 0.41             |
| <hr/>                               |     |     |                  |                  |     |     |                  |                  |
| <b>Non-MSI-high</b>                 |     |     |                  |                  |     |     |                  |                  |
| M1:M2 density ratio                 |     |     |                  |                  |     |     |                  |                  |
| Low                                 | 369 | 134 | 1 (referent)     | 1 (referent)     | 385 | 143 | 1 (referent)     | 1 (referent)     |
| High                                | 358 | 111 | 0.79 (0.60-1.03) | 0.75 (0.57-0.99) | 361 | 112 | 0.76 (0.58-0.98) | 0.75 (0.57-0.98) |
| <b>MSI-high</b>                     |     |     |                  |                  |     |     |                  |                  |
| M1:M2 density ratio                 |     |     |                  |                  |     |     |                  |                  |
| Low                                 | 68  | 12  | 1 (referent)     | 1 (referent)     | 65  | 14  | 1 (referent)     | 1 (referent)     |
| High                                | 84  | 10  | 0.50 (0.20-1.23) | 0.77 (0.30-2.01) | 88  | 8   | 0.25 (0.10-0.65) | 0.40 (0.15-1.10) |
| $P_{\text{interaction}}^{\ddagger}$ |     |     | 0.34             | 0.93             |     |     | 0.028            | 0.31             |

\* IPW was applied to reduce bias due to the availability of tumor tissue after cancer diagnosis (see “Statistical Analysis” subsection for details).

† The multivariable Cox regression model initially included sex, age, year of diagnosis, family history of colorectal cancer, tumor location, tumor differentiation, disease stage, microsatellite instability, CpG island methylator phenotype, *KRAS*, *BRAF*, and *PIK3CA* mutations, and long-interspersed nucleotide element-1 methylation level. A backward elimination with a threshold *P* of 0.05 was used to select variables for the final models.

‡  $P_{\text{interaction}}$  (two-sided) was calculated using the Wald test for the cross product of the macrophage density or density ratio (high vs. low) and MSI status (high vs. non-high) in the IPW-adjusted Cox regression model.

Abbreviations: CI, confidence interval; HR, hazard ratio; IPW, inverse probability weighting.

**Supplementary Table S8.** Macrophage densities and M1:M2 macrophage density ratio in tumor intraepithelial and stromal regions and patient survival in strata of year of diagnosis with inverse probability weighting (IPW)

|                                     | Tumor intraepithelial region        |               |                          |                              | Stromal region                      |               |                          |                              |
|-------------------------------------|-------------------------------------|---------------|--------------------------|------------------------------|-------------------------------------|---------------|--------------------------|------------------------------|
|                                     | Colorectal cancer-specific survival |               |                          |                              | Colorectal cancer-specific survival |               |                          |                              |
|                                     | No. of cases                        | No. of events | Univariable HR (95% CI)* | Multivariable HR (95% CI)*,† | No. of cases                        | No. of events | Univariable HR (95% CI)* | Multivariable HR (95% CI)*,† |
| <b>Diagnosed in 1995 or before</b>  |                                     |               |                          |                              |                                     |               |                          |                              |
| Macrophage density                  |                                     |               |                          |                              |                                     |               |                          |                              |
| Low                                 | 172                                 | 59            | 1 (referent)             | 1 (referent)                 | 187                                 | 61            | 1 (referent)             | 1 (referent)                 |
| High                                | 132                                 | 41            | 0.80 (0.52-1.24)         | 0.74 (0.47-1.16)             | 117                                 | 39            | 0.94 (0.61-1.47)         | 0.94 (0.61-1.46)             |
| <b>Diagnosed in 1996 to 2000</b>    |                                     |               |                          |                              |                                     |               |                          |                              |
| Macrophage density                  |                                     |               |                          |                              |                                     |               |                          |                              |
| Low                                 | 131                                 | 52            | 1 (referent)             | 1 (referent)                 | 129                                 | 58            | 1 (referent)             | 1 (referent)                 |
| High                                | 172                                 | 55            | 0.91 (0.61-1.36)         | 0.94 (0.61-1.43)             | 174                                 | 49            | 0.60 (0.40-0.91)         | 0.70 (0.46-1.07)             |
| <b>Diagnosed in 2001 to 2008</b>    |                                     |               |                          |                              |                                     |               |                          |                              |
| Macrophage density                  |                                     |               |                          |                              |                                     |               |                          |                              |
| Low                                 | 160                                 | 43            | 1 (referent)             | 1 (referent)                 | 145                                 | 42            | 1 (referent)             | 1 (referent)                 |
| High                                | 164                                 | 38            | 0.89 (0.57-1.39)         | 0.96 (0.59-1.58)             | 179                                 | 39            | 0.77 (0.49-1.20)         | 0.74 (0.46-1.19)             |
| $P_{\text{interaction}}^{\ddagger}$ |                                     |               | 0.77                     | 0.39                         |                                     |               | 0.38                     | 0.37                         |
| <b>Diagnosed in 1995 or before</b>  |                                     |               |                          |                              |                                     |               |                          |                              |
| M1-like macrophage density          |                                     |               |                          |                              |                                     |               |                          |                              |
| Low                                 | 175                                 | 59            | 1 (referent)             | 1 (referent)                 | 189                                 | 73            | 1 (referent)             | 1 (referent)                 |
| High                                | 129                                 | 41            | 0.78 (0.51-1.20)         | 0.78 (0.51-1.20)             | 115                                 | 27            | 0.46 (0.28-0.74)         | 0.53 (0.33-0.87)             |
| <b>Diagnosed in 1996 to 2000</b>    |                                     |               |                          |                              |                                     |               |                          |                              |
| M1-like macrophage density          |                                     |               |                          |                              |                                     |               |                          |                              |
| Low                                 | 129                                 | 50            | 1 (referent)             | 1 (referent)                 | 131                                 | 55            | 1 (referent)             | 1 (referent)                 |
| High                                | 174                                 | 57            | 0.90 (0.60-1.34)         | 1.09 (0.71-1.66)             | 172                                 | 52            | 0.68 (0.45-1.01)         | 0.90 (0.59-1.39)             |
| <b>Diagnosed in 2001 to 2008</b>    |                                     |               |                          |                              |                                     |               |                          |                              |

|                                     |     |    |                  |                  |     |    |                  |                  |
|-------------------------------------|-----|----|------------------|------------------|-----|----|------------------|------------------|
| <b>M1-like macrophage density</b>   |     |    |                  |                  |     |    |                  |                  |
| Low                                 | 162 | 49 | 1 (referent)     | 1 (referent)     | 141 | 49 | 1 (referent)     | 1 (referent)     |
| High                                | 162 | 32 | 0.62 (0.39-0.98) | 0.74 (0.46-1.20) | 183 | 32 | 0.51 (0.33-0.81) | 0.59 (0.37-0.95) |
| $P_{\text{interaction}}^{\ddagger}$ |     |    | 0.51             | 0.99             |     |    | 0.82             | 0.77             |

**Diagnosed in 1995 or before**

|                                   |     |    |                  |                  |     |    |                  |                  |
|-----------------------------------|-----|----|------------------|------------------|-----|----|------------------|------------------|
| <b>M2-like macrophage density</b> |     |    |                  |                  |     |    |                  |                  |
| Low                               | 170 | 56 | 1 (referent)     | 1 (referent)     | 178 | 55 | 1 (referent)     | 1 (referent)     |
| High                              | 134 | 44 | 1.11 (0.72-1.70) | 0.99 (0.64-1.53) | 126 | 45 | 1.38 (0.90-2.13) | 1.41 (0.91-2.17) |

**Diagnosed in 1996 to 2000**

|                                   |     |    |                  |                  |     |    |                  |                  |
|-----------------------------------|-----|----|------------------|------------------|-----|----|------------------|------------------|
| <b>M2-like macrophage density</b> |     |    |                  |                  |     |    |                  |                  |
| Low                               | 138 | 46 | 1 (referent)     | 1 (referent)     | 140 | 44 | 1 (referent)     | 1 (referent)     |
| High                              | 165 | 61 | 1.35 (0.90-2.04) | 1.48 (0.96-2.27) | 163 | 63 | 1.39 (0.92-2.09) | 1.31 (0.86-2.02) |

**Diagnosed in 2001 to 2008**

|                                   |     |    |                  |                  |     |    |                  |                  |
|-----------------------------------|-----|----|------------------|------------------|-----|----|------------------|------------------|
| <b>M2-like macrophage density</b> |     |    |                  |                  |     |    |                  |                  |
| Low                               | 154 | 42 | 1 (referent)     | 1 (referent)     | 141 | 28 | 1 (referent)     | 1 (referent)     |
| High                              | 170 | 39 | 0.89 (0.57-1.40) | 1.08 (0.67-1.72) | 183 | 53 | 1.74 (1.09-2.77) | 1.74 (1.08-2.81) |

|                                     |  |  |      |      |  |  |      |      |
|-------------------------------------|--|--|------|------|--|--|------|------|
| $P_{\text{interaction}}^{\ddagger}$ |  |  | 0.55 | 0.68 |  |  | 0.58 | 0.62 |
|-------------------------------------|--|--|------|------|--|--|------|------|

**Diagnosed in 1995 or before**

|                            |     |    |                  |                  |     |    |                  |                  |
|----------------------------|-----|----|------------------|------------------|-----|----|------------------|------------------|
| <b>M1:M2 density ratio</b> |     |    |                  |                  |     |    |                  |                  |
| Low                        | 146 | 48 | 1 (referent)     | 1 (referent)     | 149 | 53 | 1 (referent)     | 1 (referent)     |
| High                       | 143 | 44 | 0.78 (0.50-1.22) | 0.73 (0.47-1.14) | 151 | 45 | 0.65 (0.43-1.00) | 0.68 (0.45-1.04) |

**Diagnosed in 1996 to 2000**

|                            |     |    |                  |                  |     |    |                  |                  |
|----------------------------|-----|----|------------------|------------------|-----|----|------------------|------------------|
| <b>M1:M2 density ratio</b> |     |    |                  |                  |     |    |                  |                  |
| Low                        | 143 | 56 | 1 (referent)     | 1 (referent)     | 150 | 62 | 1 (referent)     | 1 (referent)     |
| High                       | 158 | 50 | 0.73 (0.48-1.09) | 0.77 (0.51-1.16) | 152 | 45 | 0.66 (0.44-0.99) | 0.74 (0.48-1.12) |

**Diagnosed in 2001 to 2008**



|                                     |     |    |                  |                  |     |    |                  |                  |  |
|-------------------------------------|-----|----|------------------|------------------|-----|----|------------------|------------------|--|
| M1:M2 density ratio                 |     |    |                  |                  |     |    |                  |                  |  |
| Low                                 | 163 | 48 | 1 (referent)     | 1 (referent)     | 170 | 50 | 1 (referent)     | 1 (referent)     |  |
| High                                | 152 | 30 | 0.64 (0.40-1.02) | 0.70 (0.43-1.13) | 154 | 31 | 0.64 (0.41-1.01) | 0.75 (0.47-1.20) |  |
| $P_{\text{interaction}}^{\ddagger}$ |     |    | 0.60             | 0.94             |     |    | 0.97             | 0.74             |  |

\* IPW was applied to reduce a bias due to the availability of tumor tissue after cancer diagnosis (see “Statistical Analysis” subsection for details).

† The multivariable Cox regression model initially included sex, age, family history of colorectal cancer, tumor location, tumor differentiation, disease stage, microsatellite instability, CpG island methylator phenotype, *KRAS*, *BRAF*, and *PIK3CA* mutations, and long-interspersed nucleotide element-1 methylation level. A backward elimination with a threshold *P* of 0.05 was used to select variables for the final models.

‡  $P_{\text{interaction}}$  (two-sided) was calculated using the Wald test for the cross product of the macrophage density or density ratio of (high vs. low) and year of diagnosis (1995 or before, 1996-2000, and 2001-2008) in the IPW-adjusted Cox regression model. Abbreviations: CI, confidence interval; HR, hazard ratio; IPW, inverse probability weighting.

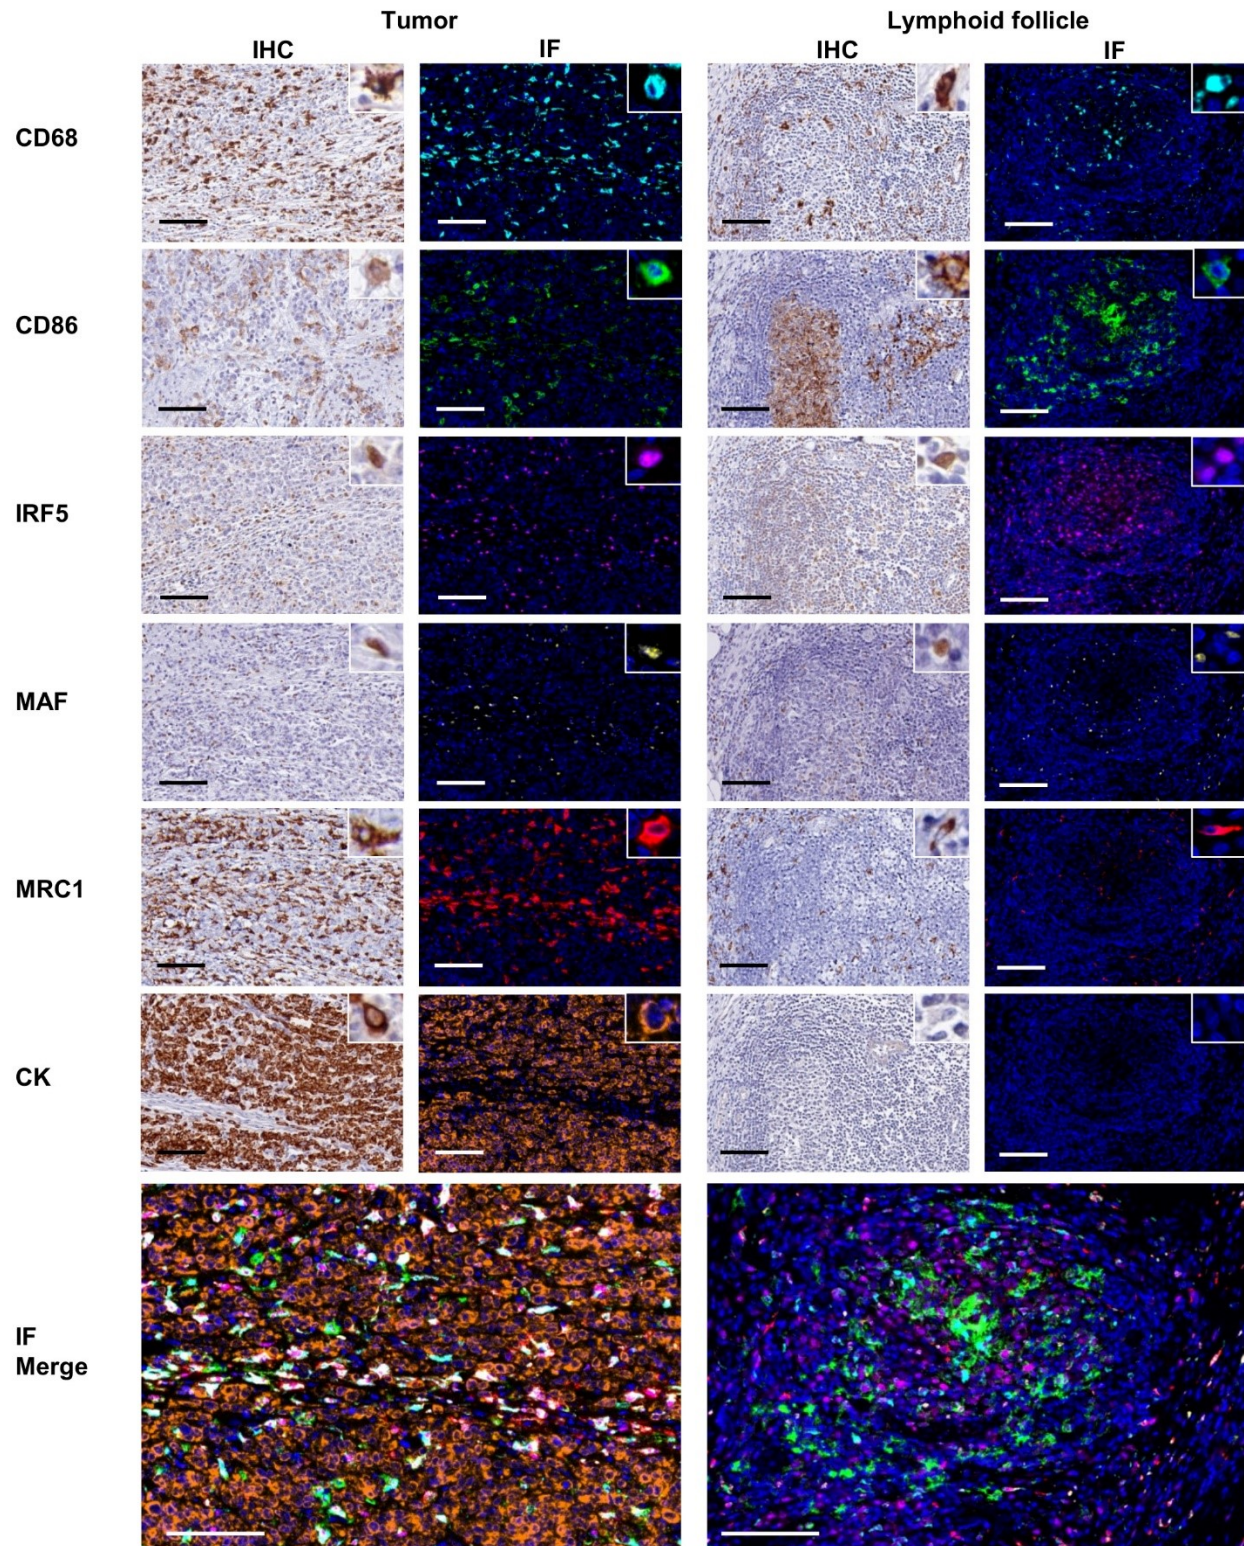

**Figure S1.** Comparison of staining patterns between multiplex immunofluorescence and standard immunohistochemistry. Scale bar is 100  $\mu$ m.

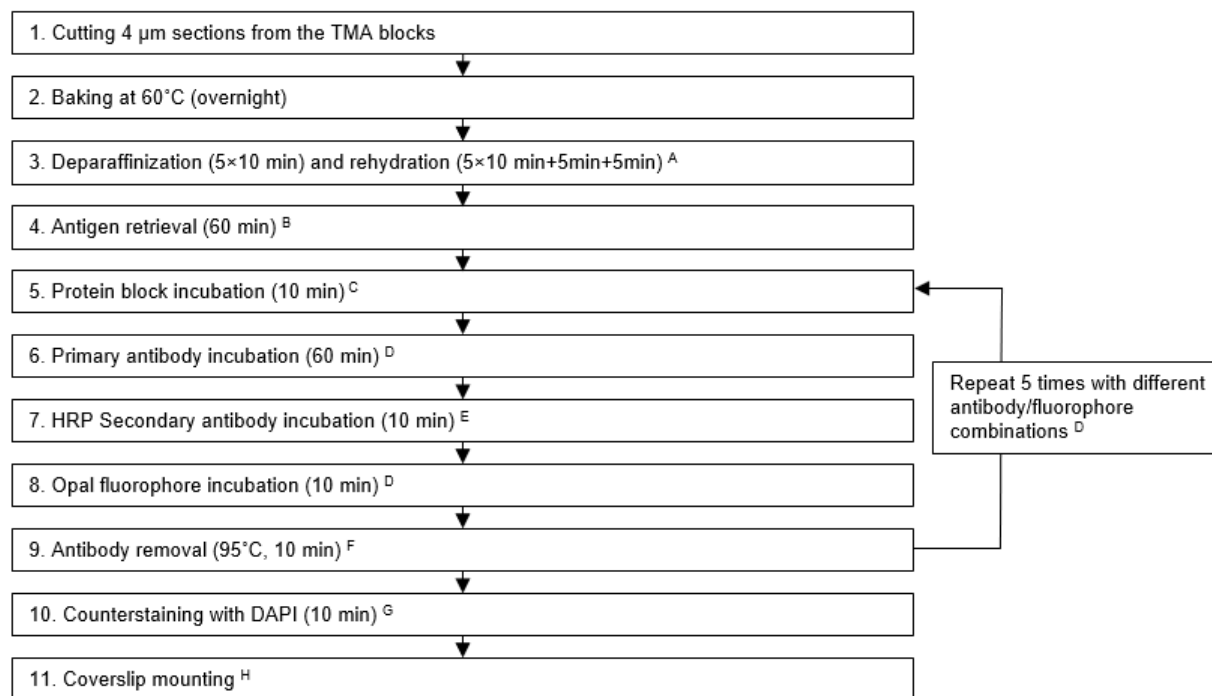

**Figure S2.** Flowchart of the cyclic immunofluorescence procedure. Steps 5-10 were performed with a Leica Bond RX Research Stainer (Leica Biosystems, Buffalo, IL, USA).

<sup>A</sup> Deparaffinization in Xylene (X3P1GAL, Fisher Scientific, Pittsburgh, PA, USA) and rehydration through graded alcohol series (100%×3+95%+80%) (HC-800-1GAL, Fisher Scientific).

<sup>B</sup> With 2100-Retriever (62700-10, Electron Microscopy Sciences, Hatfield, PA, USA) in Citrate buffer pH 6.0 (S1699, Dako, Copenhagen, Denmark)

<sup>C</sup> Protein Block, Serum-Free (X0909, Dako)

<sup>D</sup> See Table S1 for details about antibodies and fluorophores

<sup>E</sup> Opal Polymer HRP Ms + Rb (ARH1001EA, Akoya Biosciences, Hopkinton, MA, USA)

<sup>F</sup> BOND Epitope Retrieval Solution 1 (AR9961, Leica Biosystems)

<sup>G</sup> Spectral DAPI (FP1490, Akoya Biosciences)

<sup>H</sup> FF Cover Glass (125485M, Fisher Scientific); ProLong Diamond Antifade Mountant (P36970, Thermo Fisher Scientific, Waltham, MA, USA)

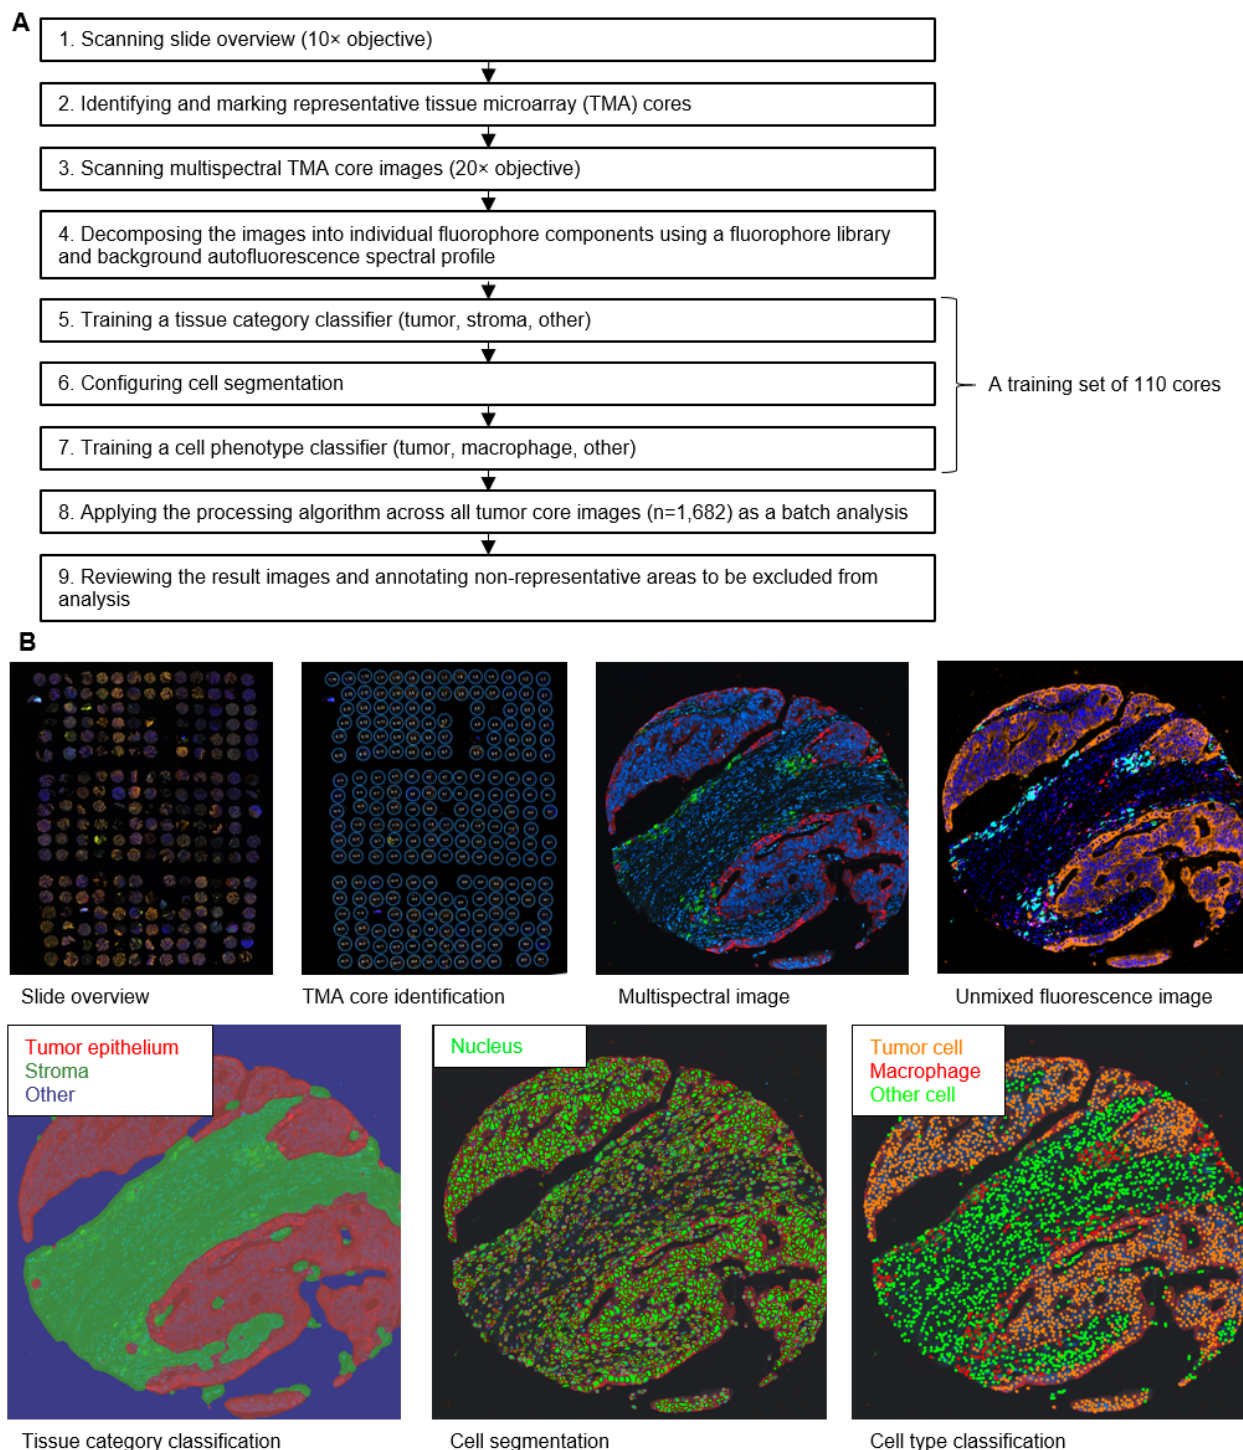

**Figure S3.** Analysis of immunofluorescence slides to quantify tumor intraepithelial and stromal macrophage densities. A. Flowchart of the scanning of the immunofluorescence slides with Vectra 3.0 Automated Quantitative Pathology Imaging System (steps 1 and 3) (Akoya Biosciences, Hopkinton, MA, USA) and processing of the images with the Phenochart (step 2) (Akoya Biosciences) and inForm software packages (steps 4-9) (Akoya Biosciences) to perform tissue category segmentation (tumor epithelium, stroma, other; using KRT expression to delineate epithelial areas), cell segmentation (using the DAPI signal to identify nuclei), and cell type classification [macrophage, tumor cell, other; using a combination of cellular morphology,

CD68 expression (macrophages), and KRT expression (tumor cells) to distinguish these phenotypes]. The cell phenotype classification implemented in the inForm software package was based on multinomial logistic regression utilizing image features derived from texture analysis and cell segmentation. B. Example images in various steps of analysis.

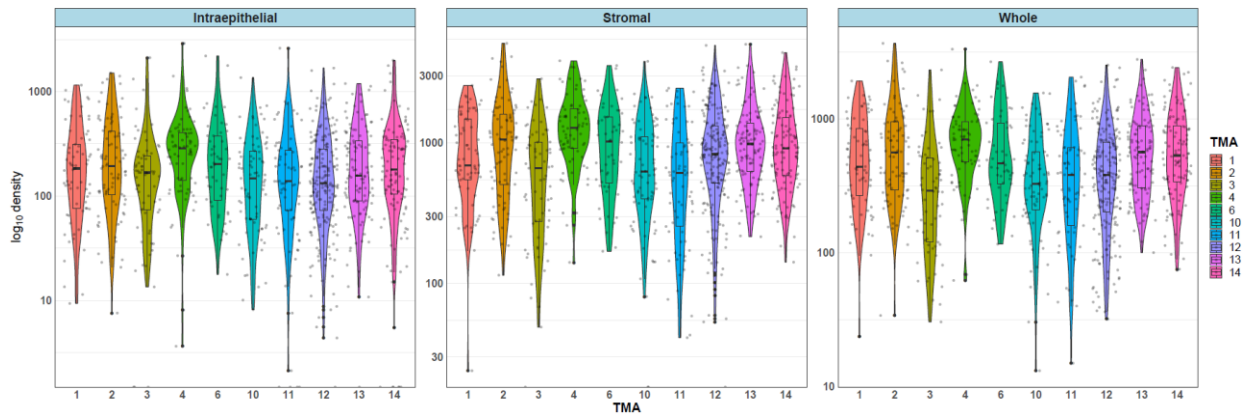

**Figure S4.** Macrophage densities across 10 TMAs (per mm<sup>2</sup>).

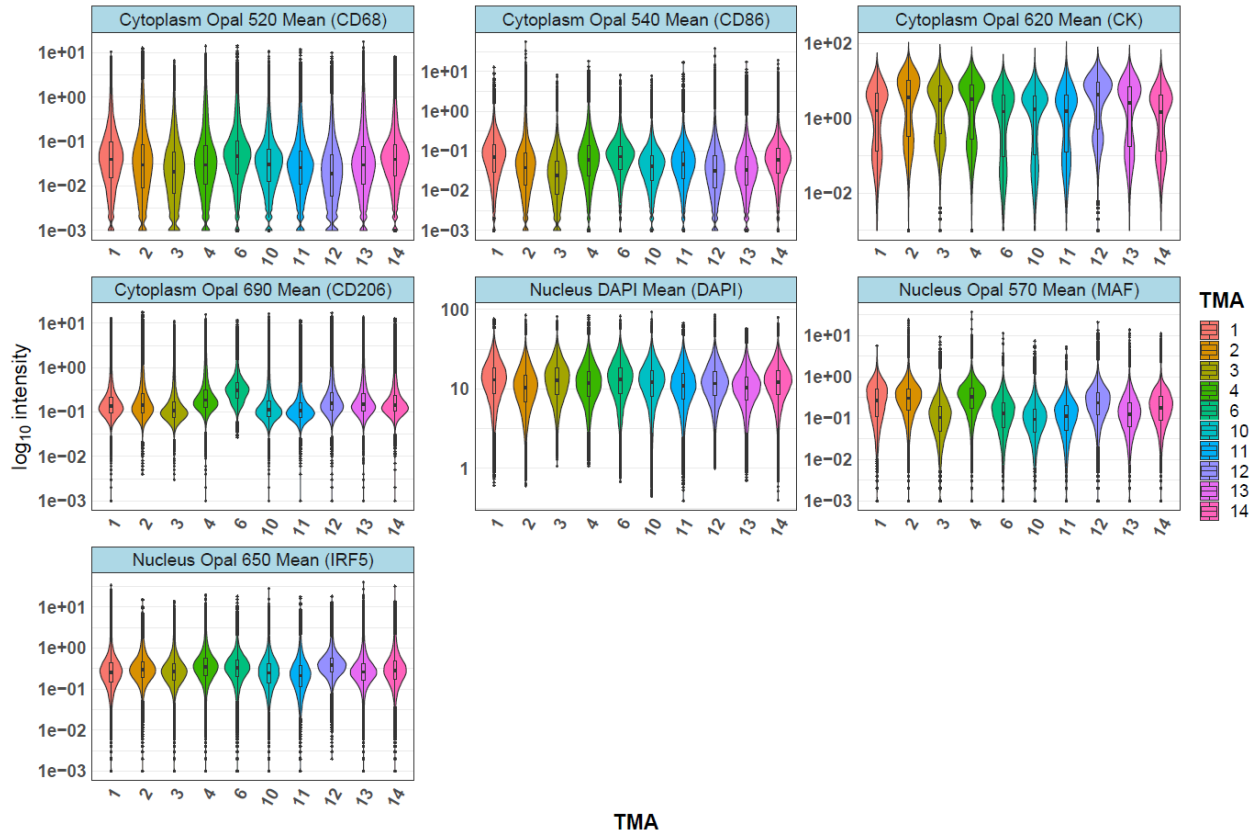

**Figure S5.** Fluorescence signal intensities across 10 TMAs.

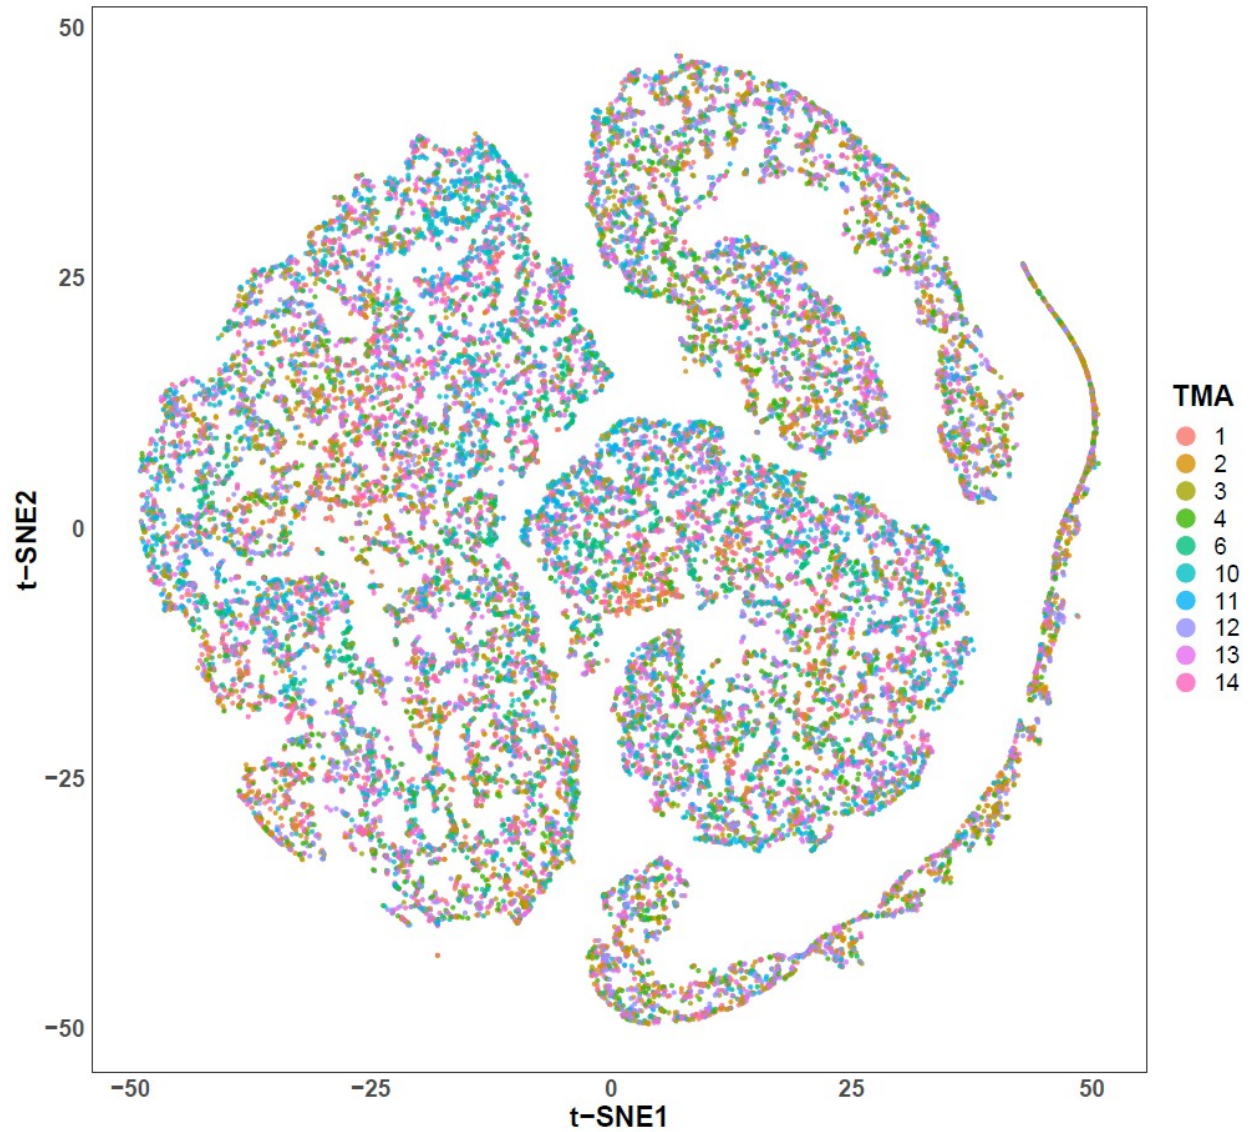

**Figure S6.** t-SNE analysis of a random sample of 0.5% of all cells based on fluorophore signal intensities shows no clear clustering according to the TMAs.



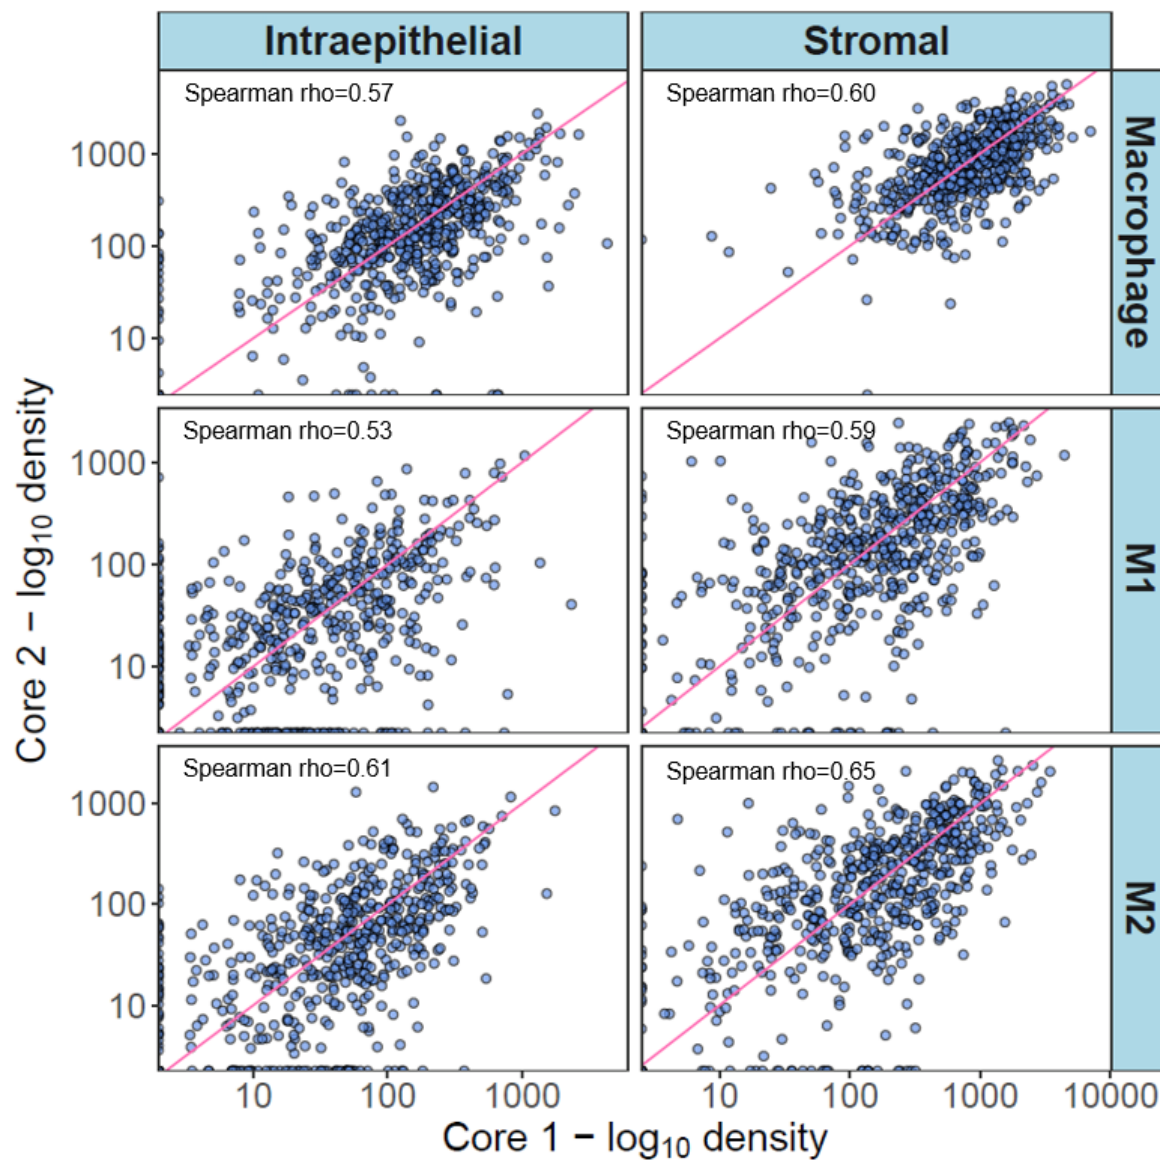

**Figure S7.** Core-to-core correlation of macrophage densities (per mm<sup>2</sup>) in two randomly chosen cores of tumors with two or more cores. Macrophages present within the 30% tails of the M1:M2 index distribution were classified as M1-like or M2-like.

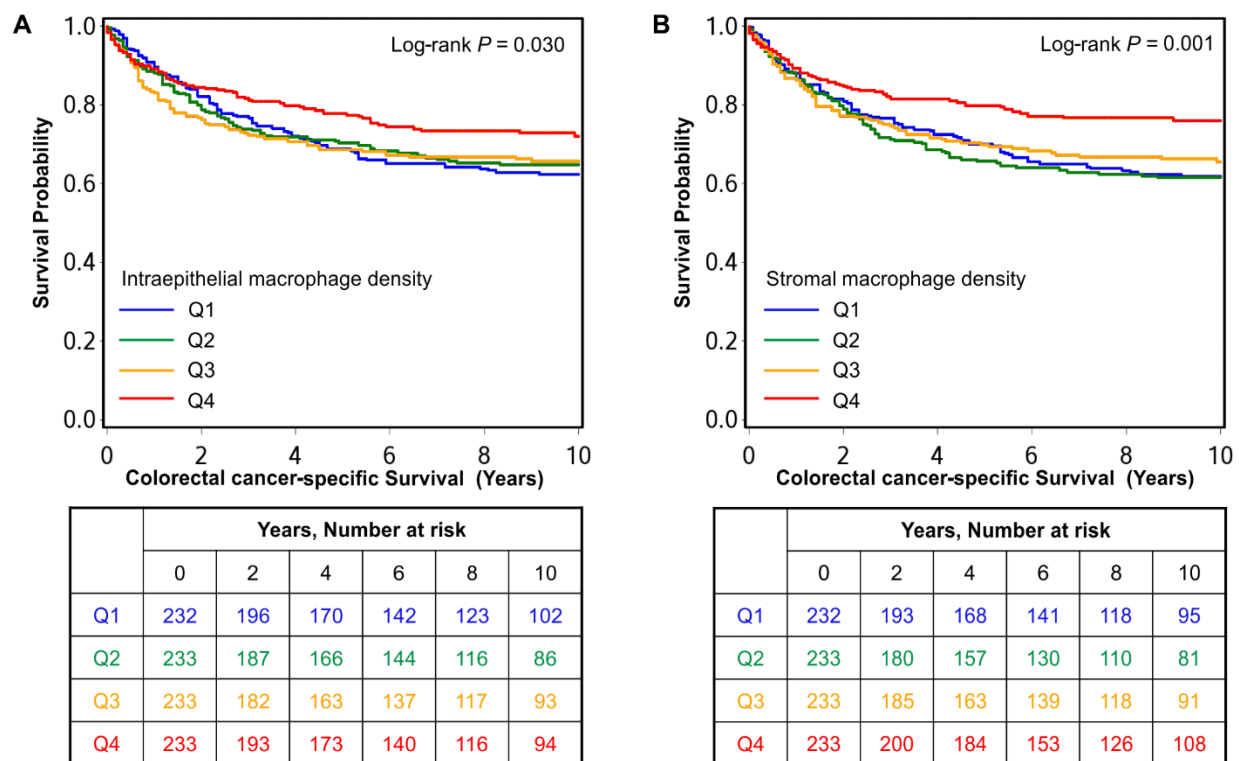

**Figure S8.** Inverse probability weighting-adjusted Kaplan-Meier survival curves of colorectal cancer survival according to the ordinal quartile categories (Q1-Q4) of intraepithelial (A) and stromal (B) macrophage densities.

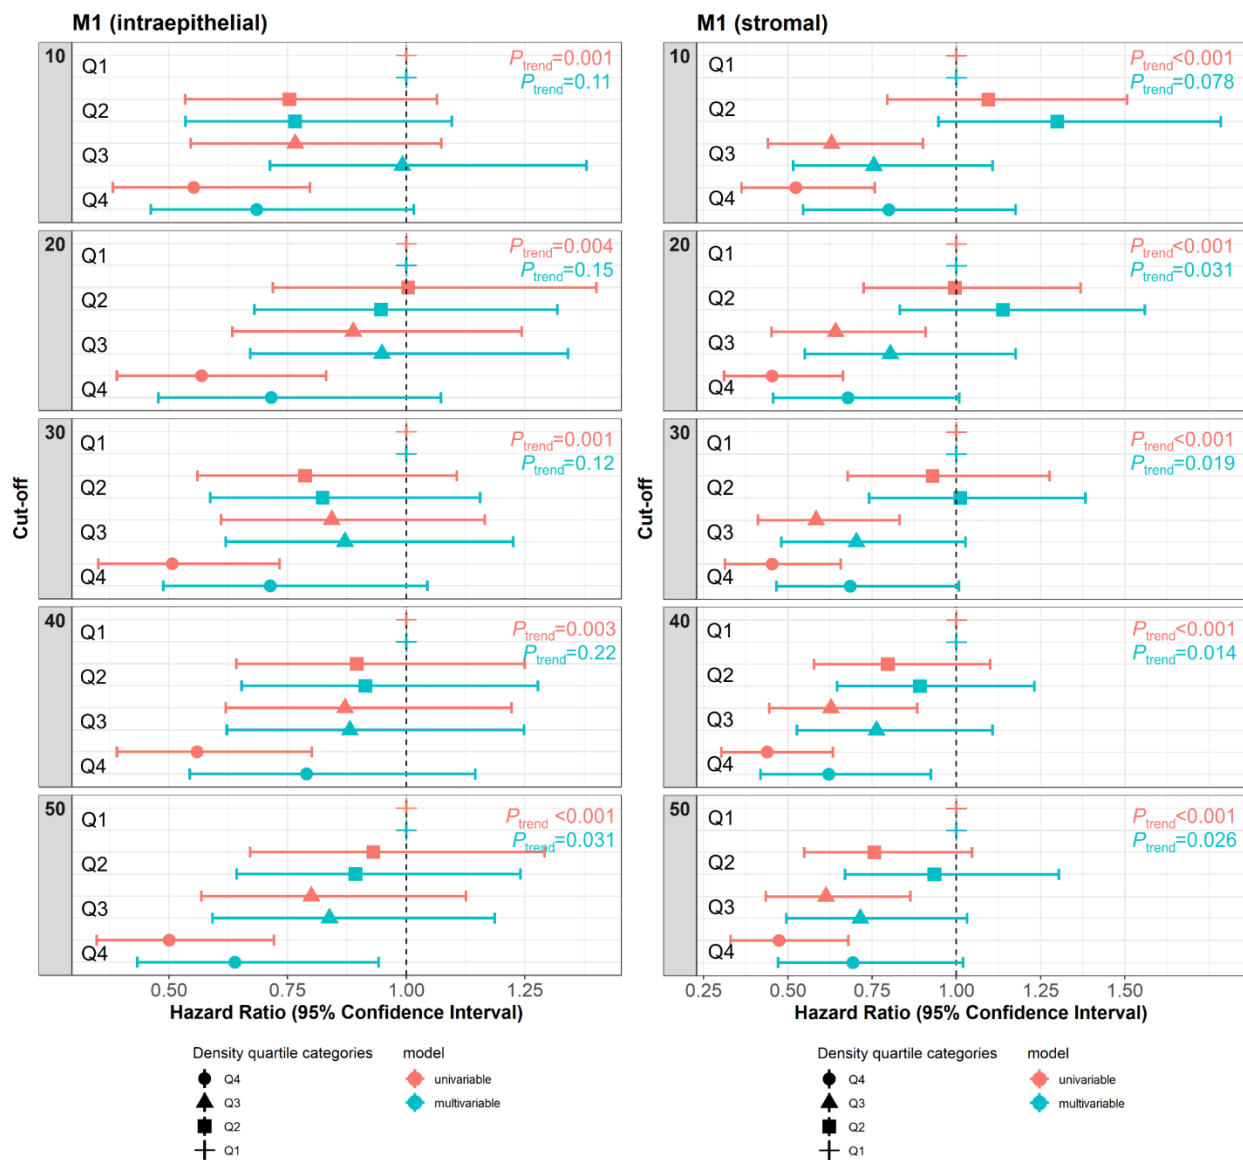

**Figure S9.** Forest plots of inverse probability weighting-adjusted Cox regression models of colorectal cancer specific survival according to the densities of intraepithelial and stromal M1-like polarized macrophages, with M1-like macrophages defined using different cut-offs (10-50%) of the M1-end of the macrophage polarization (M1:M2) index distribution. The multivariable Cox regression model initially included sex, age, year of diagnosis, family history of colorectal cancer, tumor location, tumor differentiation, disease stage, microsatellite instability, CpG island methylator phenotype, *KRAS*, *BRAF*, and *PIK3CA* mutations, and long-interspersed nucleotide element-1 methylation level. A backward elimination with a threshold  $P$  of 0.05 was used to select variables for the final models.

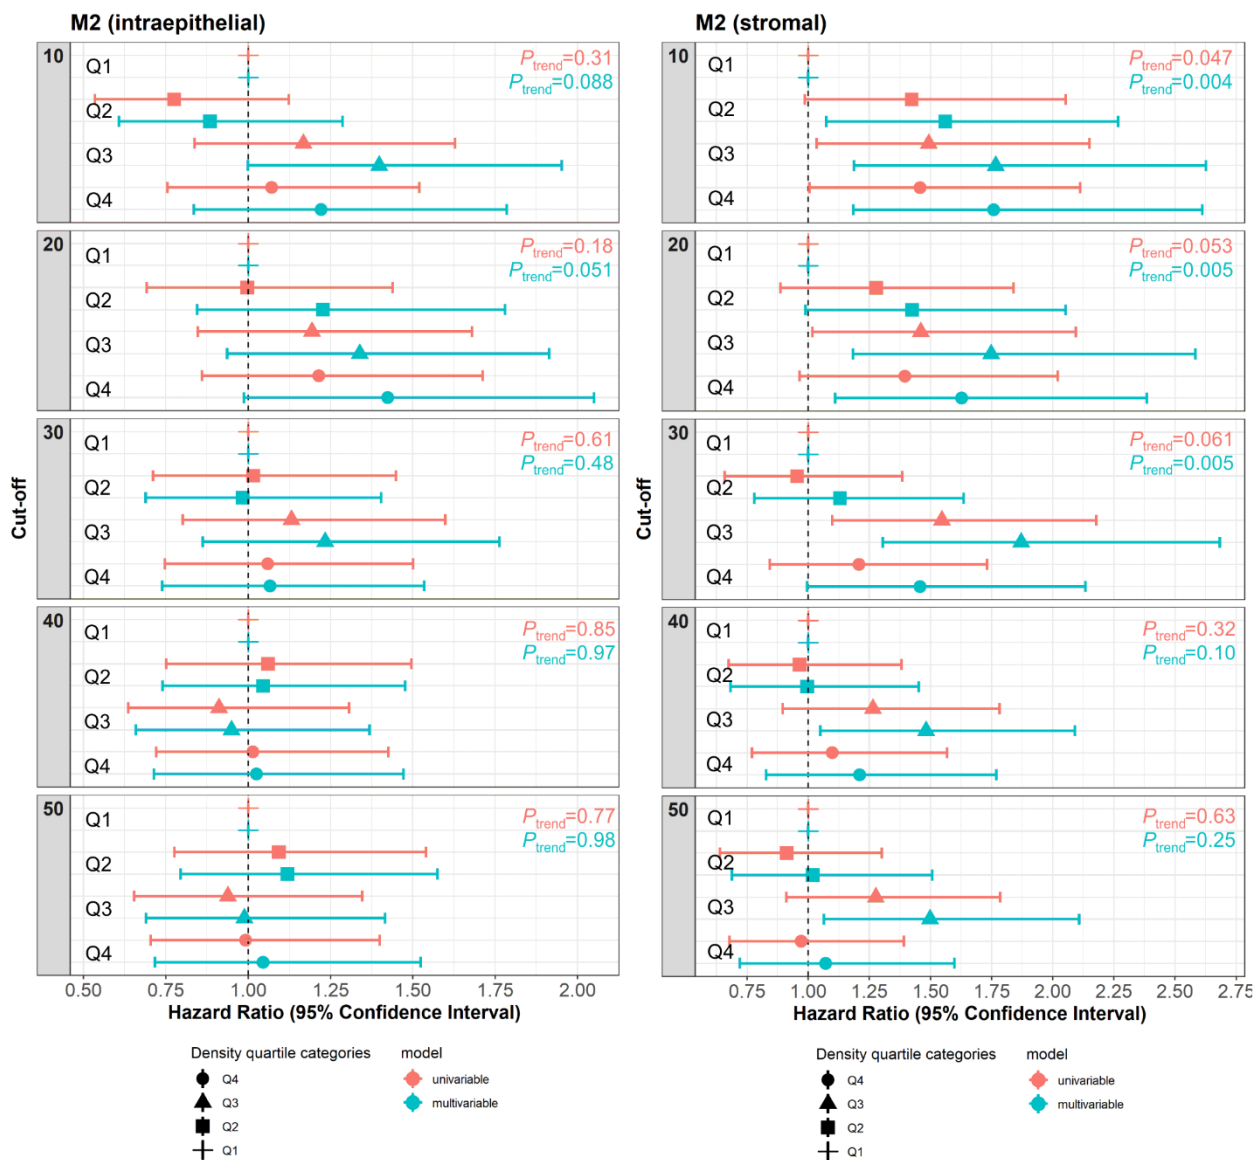

**Figure S10.** Forest plots of inverse probability weighting-adjusted Cox regression models of colorectal cancer specific survival according to the densities of intraepithelial and stromal M2-like polarized macrophages, with M2-like macrophages defined using different cut-offs (10-50%) of the M2-end of the macrophage polarization (M1:M2) index distribution. The multivariable Cox regression model initially included sex, age, year of diagnosis, family history of colorectal cancer, tumor location, tumor differentiation, disease stage, microsatellite instability, CpG island methylator phenotype, *KRAS*, *BRAF*, and *PIK3CA* mutations, and long-interspersed nucleotide element-1 methylation level. A backward elimination with a threshold  $P$  of 0.05 was used to select variables for the final models.

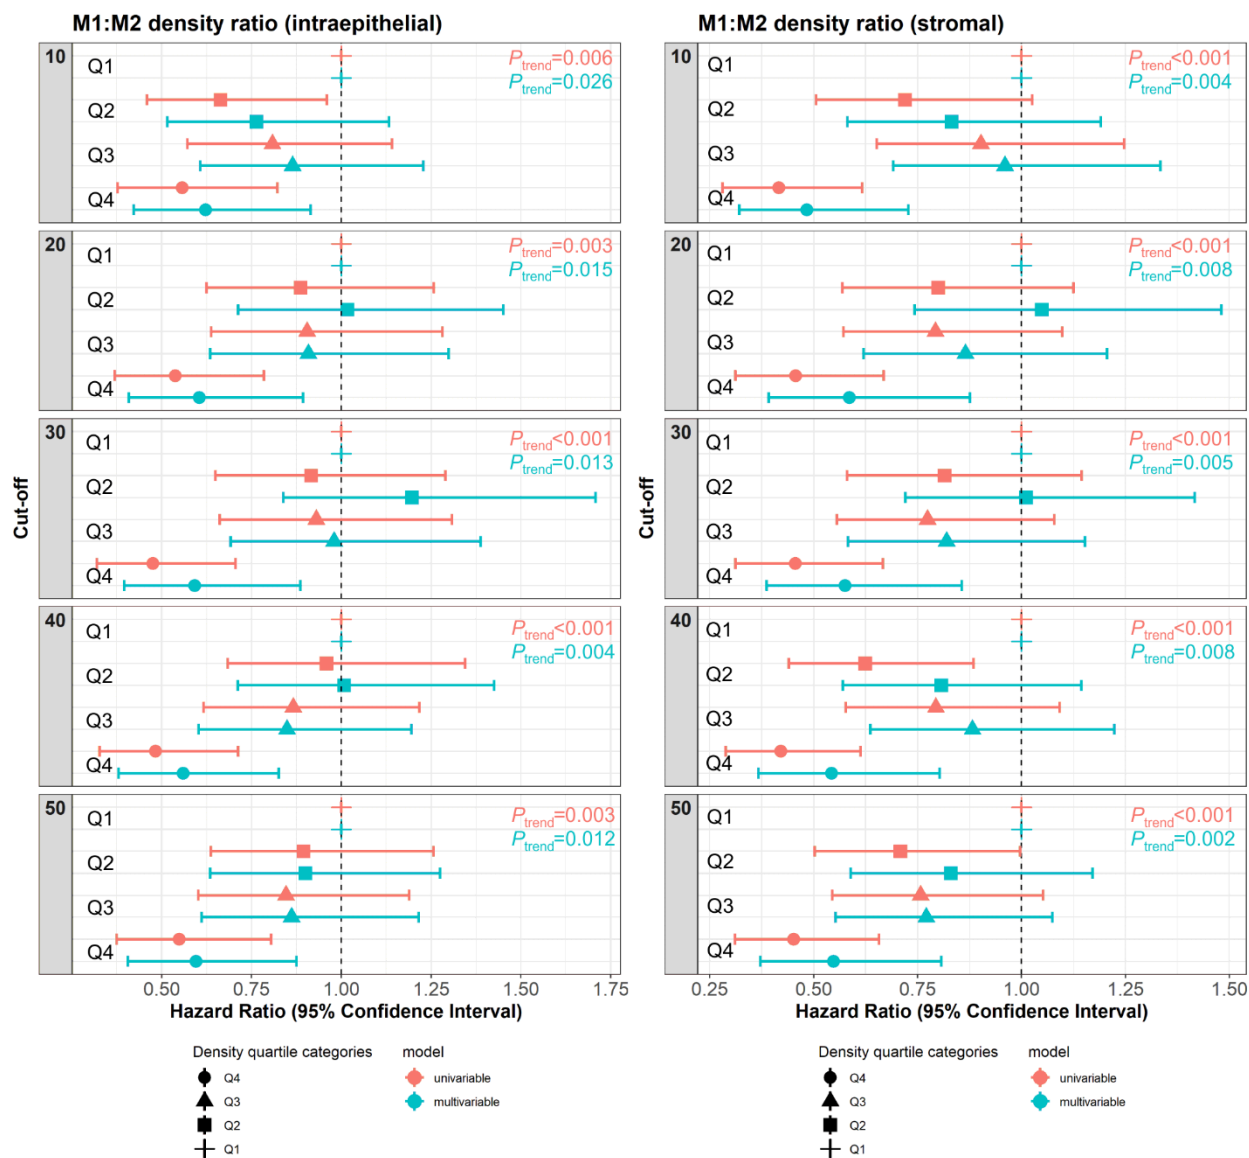

**Figure S11.** Forest plots of inverse probability weighting-adjusted Cox regression models of colorectal cancer specific survival according to the intraepithelial and stromal M1:M2-density ratio with M1-like and M2-like macrophages defined using different cut-offs (10-50%) of both tails of the macrophage polarization (M1:M2) index distribution. The multivariable Cox regression model initially included sex, age, year of diagnosis, family history of colorectal cancer, tumor location, tumor differentiation, disease stage, microsatellite instability, CpG island methylator phenotype, *KRAS*, *BRAF*, and *PIK3CA* mutations, and long-interspersed nucleotide element-1 methylation level. A backward elimination with a threshold *P* of 0.05 was used to select variables for the final models.

**A. Tumor infiltrating lymphocytes**

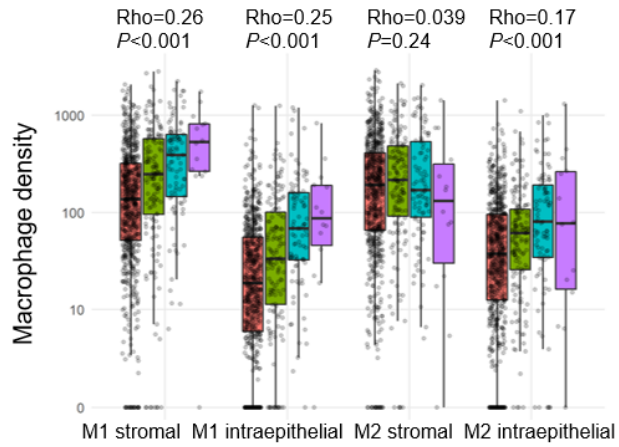

**B. Intratumoral periglandular lymphocytic reaction**

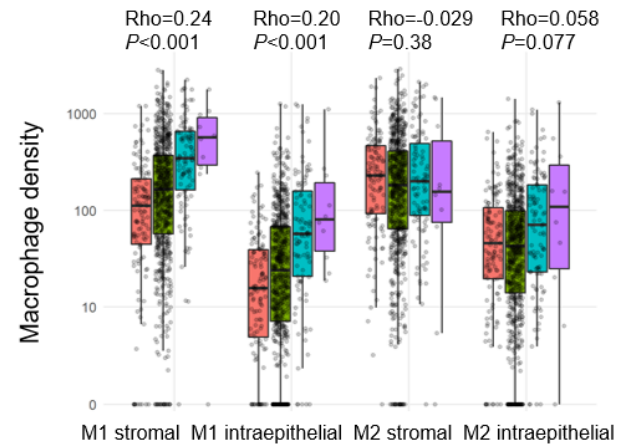

**C. Peritumoral lymphocytic reaction**

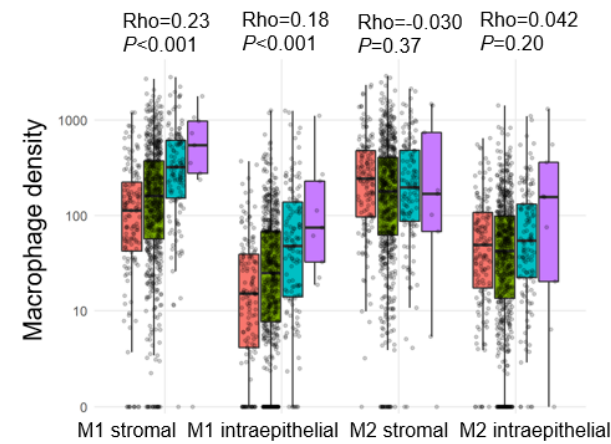

**D. Crohn's-like lymphoid reaction**

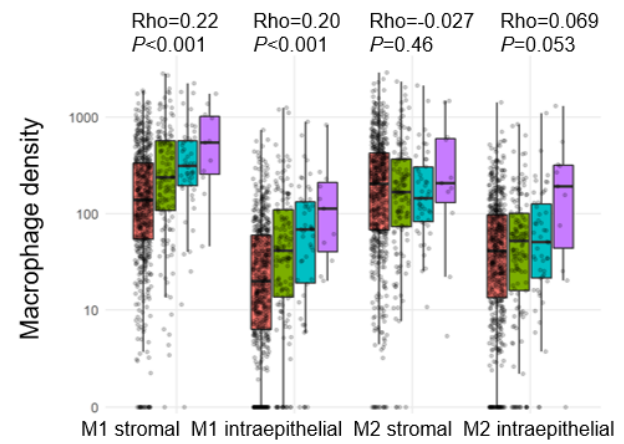

**Lymphocytic reaction scores**

- 0: Absent or very low
- 1: Low
- 2: Intermediate
- 3: High

**Figure S12.** Densities of M1-like and M2-like macrophages in relation to histologic lymphocytic reaction patterns. A. Tumor infiltrating lymphocytes. B. Intratumoral periglandular lymphocytic reaction. C. Peritumoral lymphocytic reaction. D. Crohn's-like lymphoid reaction.

## References

1. Ogino S, Kawasaki T, Kirkner GJ, Kraft P, Loda M, Fuchs CS. Evaluation of markers for CpG island methylator phenotype (CIMP) in colorectal cancer by a large population-based sample. *J Mol Diagn.* 2007;9:305–14.
2. Ogino S, Kawasaki T, Nosho K, Ohnishi M, Suemoto Y, Kirkner GJ, et al. LINE-1 hypomethylation is inversely associated with microsatellite instability and CpG island methylator phenotype in colorectal cancer. *Int J cancer.* 2008;122:2767–73.
3. Nosho K, Kawasaki T, Ohnishi M, Suemoto Y, Kirkner GJ, Zepf D, et al. PIK3CA mutation in colorectal cancer: relationship with genetic and epigenetic alterations. *Neoplasia.* 2008;10:534–41.
4. Giannakis M, Mu XJ, Shukla SA, Qian ZR, Cohen O, Nishihara R, et al. Genomic Correlates of Immune-Cell Infiltrates in Colorectal Carcinoma. *Cell Rep.* 2016;15:857–65.
5. Liu L, Nevo D, Nishihara R, Cao Y, Song M, Twombly TS, et al. Utility of inverse probability weighting in molecular pathological epidemiology. *Eur J Epidemiol.* 2018;33:381–92.
6. Nosho K, Irahara N, Shima K, Kure S, Kirkner GJ, Schernhammer ES, et al. Comprehensive biostatistical analysis of CpG island methylator phenotype in colorectal cancer using a large population-based sample. *PLoS One.* 2008;3:e3698.
